# Supplementary material for: Spatial Heterogeneity in Human Activities Favors the Persistence of Wolves in Agroecosystems
Source: PLoS One. 2014 Sep 24;9(9):e108080. doi: 10.1371/journal.pone.0108080 (PMC4176725; doi:10.1371/journal.pone.0108080)
Supplement: Table S1 — Results from Generalized Linear Models testing for significant effects of the pairwise interactions between land use and type of roads with elevation and roughness. (DOC) [file pone.0108080.s003.doc]

**Table S1.** Results from Generalized Linear Models testing for significant effects in the pairwise interactions between land uses and type of roads with elevation and roughness. Statistics include Likelihood Ratio (LR) χ2 and P-value of Wald χ2.

| Models | Terms | LR χ2 | *P* of Wald χ2 |
| --- | --- | --- | --- |
| Irrigated farms × (Altitude + Roughness) | Irrigated farms | 3.163 | 0.075 |
|  | Altitude | 8.276 | 0.004 |
|  | Roughness | 3.093 | 0.078 |
|  | Irrigated farms × Altitude | 0.461 | 0.496 |
|  | Irrigated farms × Roughness | 6.147 | 0.013 |
| Dry farms × (Altitude + Roughness) | Dry farms | 0.185 | 0.667 |
|  | Altitude | 9.535 | 0.002 |
|  | Roughness | 1.493 | 0.221 |
|  | Dry farms × Altitude | 0.091 | 0.763 |
|  | Dry farms × Roughness | 2.982 | 0.084 |
| Rangeland × (Altitude + Roughness) | Rangeland | 0.701 | 0.402 |
|  | Altitude | 13.988 | 0.001 |
|  | Roughness | 1.011 | 0.314 |
|  | Rangeland × Altitude | 0.797 | 0.371 |
|  | Rangeland × Roughness | 3.725 | 0.087 |
| Range_Dry farms × (Altitude + Roughness) | Range_Dry farms | 9.458 | 0.002 |
|  | Altitude | 7.995 | 0.004 |
|  | Roughness | 2.777 | 0.95 |
|  | Range_Dry farms × Altitude | 1.681 | 0.194 |
|  | Range_Dry farms × Roughness | 0.531 | 0.466 |
| Primary road × (Altitude + Roughness) | Primary road | 6.963 | 0.008 |
|  | Altitude | 7.158 | 0.007 |
|  | Roughness | 3.712 | 0.54 |
|  | Primary road × Altitude | 0.283 | 0.594 |
|  | Primary road × Roughness | 0.159 | 0.689 |
| Secondary road × (Altitude + Roughness) | Secondary road | 0.286 | 0.592 |
|  | Altitude | 12.490 | 0.001 |
|  | Roughness | 1.054 | 0.304 |
|  | Secondary road × Altitude | 3.967 | 0.043 |
|  | Secondary road × Roughness | 1.287 | 0.256 |
